# Supplementary material
Source: HighWire-hosted journal article supplement (https://jnnp.bmj.com/content/93/6/617)
Supplement: inline-supplementary-material-2 [file inline-supplementary-material-2.xlsx]

## Sheet: Calculator
Composite clinical motor score calculator
Composite clinical score = ((MDS-UPDRSIII – 23.8829) x 0.0377 + (-1 x Purdue + 28.9286) x 0.0739 + (TUG – 9.8746) x 0.1414 + 3.8239) x 6.0946
Insert values in the columns below:
MDS-UPDRS III	Purdue	TUG	Composite clinical score		Constants
34	22	11	29.7188		MDS-UPDRS constant 1	23.8829
					MDS-UPDRS constant 2	0.0376793
					Purdue constant 1	28.9286
					Purdue constant 2	0.0738899
					TUG constant 1	9.87458
					TUG constant 2	0.141411
					Scaler 1	3.82392
					Scaler 2	6.09463
